# Supplementary material for: The antioxidant activities, cytotoxic properties, and identification of water-soluble compounds of Ficus deltoidea leaves
Source: PeerJ. 2018 Oct 11;6:e5694. doi: 10.7717/peerj.5694 (PMC6186405; doi:10.7717/peerj.5694)
Supplement: Data S1 [file peerj-06-5694-s001.xlsx]

## Sheet: Lipid peroxidation
	FDS							FDM							FDB
	Crude							Crude							Crude
	Conc.	1	2	3	Mean	SD		Conc.	1	2	3	Mean	SD		Conc.	1	2	3	Mean	SD
	0	0.139	0.14	0.143	0.140667	0.00208167		0	0.101	0.105	0.108	0.104667	0.00351188		0	0.148	0.15	0.152	0.15	0.002
	100	0.139	0.139	0.139	0.139	0		100	0.086	0.088	0.089	0.0876667	0.00152753		100	0.127	0.127	0.128	0.127333	0.00057735
	500	0.127	0.132	0.133	0.130667	0.00321455		500	0.077	0.078	0.079	0.078	0.001		500	0.08	0.081	0.083	0.0813333	0.00152753
	1000	0.122	0.123	0.127	0.124	0.00264575		1000	0.067	0.07	0.072	0.0696667	0.00251661		1000	0.075	0.075	0.075	0.075	0
	2000	0.113	0.118	0.119	0.116667	0.00321455		2000	0.067	0.07	0.071	0.0693333	0.00208167		2000	0.072	0.073	0.073	0.0726667	0.00057735
	Water fraction							Water fraction							Water fraction
	Conc.	1	2	3	Mean	SD		Conc.	1	2	3	Mean	SD		Conc.	1	2	3	Mean	SD
	0	0.133	0.135	0.136	0.134667	0.00152753		0	0.105	0.109	0.117	0.110333	0.0061101		0	0.085	0.086	0.086	0.0856667	0.00057735
	100	0.102	0.104	0.105	0.103667	0.00152753		100	0.089	0.09	0.092	0.0903333	0.00152753		100	0.083	0.084	0.085	0.084	0.001
	500	0.093	0.102	0.102	0.099	0.00519615		500	0.085	0.086	0.086	0.0856667	0.00057735		500	0.081	0.082	0.082	0.0816667	0.00057735
	1000	0.084	0.106	0.107	0.099	0.013		1000	0.071	0.072	0.074	0.0723333	0.00152753		1000	0.069	0.073	0.075	0.0723333	0.00305505
	2000	0.087	0.089	0.091	0.089	0.002		2000	0.071	0.072	0.072	0.0716667	0.00057735		2000	0.064	0.066	0.068	0.066	0.002
	Ethyl acetate fraction							Ethyl acetate fraction							Ethyl acetate fraction
	Conc.	1	2	3	Mean	SD		Conc.	1	2	3	Mean	SD		Conc.	1	2	3	Mean	SD
	0	0.152	0.154	0.154	0.153333	0.0011547		0	0.15	0.152	0.155	0.152333	0.00251661		0	0.142	0.144	0.147	0.144333	0.00251661
	100	0.136	0.137	0.139	0.137333	0.00152753		100	0.11	0.114	0.117	0.113667	0.00351188		100	0.121	0.133	0.137	0.130333	0.00832666
	500	0.096	0.099	0.099	0.098	0.00173205		500	0.113	0.113	0.118	0.114667	0.00288675		500	0.11	0.11	0.113	0.111	0.00173205
	1000	0.09	0.094	0.094	0.0926667	0.0023094		1000	0.111	0.112	0.116	0.113	0.00264575		1000	0.093	0.095	0.096	0.0946667	0.00152753
	2000	0.08	0.08	0.088	0.0826667	0.0046188		2000	0.105	0.109	0.11	0.108	0.00264575		2000	0.085	0.086	0.087	0.086	0.001

## Sheet: DPPH
	FDS							FDM							FDB
	Crude							Crude							Crude
	Conc.	1	2	3	Mean	SD		Conc.	1	2	3	Mean	SD		Conc.	1	2	3	Mean	SD
	0	0.402	0.405	0.405	0.404	0.00173205		0	0.377	0.396	0.397	0.39	0.0112694		0	0.406	0.406	0.413	0.408333	0.00404145
	100	0.395	0.398	0.405	0.399333	0.0051316		100	0.341	0.353	0.362	0.352	0.0105357		100	0.357	0.36	0.37	0.362333	0.00680686
	200	0.367	0.373	0.384	0.374667	0.00862168		200	0.293	0.295	0.296	0.294667	0.00152753		200	0.301	0.306	0.308	0.305	0.00360555
	400	0.336	0.338	0.341	0.338333	0.00251661		400	0.207	0.213	0.214	0.211333	0.00378594		400	0.212	0.214	0.214	0.213333	0.0011547
	Water fraction							Water fraction							Water fraction
	Conc.	1	2	3	Mean	SD		Conc.	1	2	3	Mean	SD		Conc.	1	2	3	Mean	SD
	0	0.353	0.353	0.354	0.353333	0.00057735		0	0.342	0.347	0.347	0.345333	0.00288675		0	0.344	0.345	0.346	0.345	0.001
	100	0.344	0.345	0.346	0.345	0.001		100	0.302	0.302	0.307	0.303667	0.00288675		100	0.28	0.282	0.283	0.281667	0.00152753
	200	0.329	0.333	0.334	0.332	0.00264575		200	0.265	0.265	0.265	0.265	0		200	0.226	0.226	0.231	0.227667	0.00288675
	400	0.299	0.303	0.304	0.302	0.00264575		400	0.198	0.205	0.219	0.207333	0.0106927		400	0.156	0.159	0.159	0.158	0.00173205
	Ethyl acetate fraction							Ethyl acetate fraction							Ethyl acetate fraction
	Conc.	1	2	3	Mean	SD		Conc.	1	2	3	Mean	SD		Conc.	1	2	3	Mean	SD
	0	0.452	0.464	0.475	0.463667	0.0115036		0	0.324	0.331	0.337	0.330667	0.00650641		0	0.301	0.305	0.315	0.307	0.0072111
	100	0.391	0.422	0.431	0.414667	0.0209841		100	0.229	0.23	0.233	0.230667	0.00208167		100	0.199	0.2	0.2	0.199667	0.00057735
	200	0.344	0.362	0.379	0.361667	0.0175024		200	0.172	0.174	0.175	0.173667	0.00152753		200	0.144	0.145	0.145	0.144667	0.00057735
	400	0.263	0.298	0.3	0.287	0.0208087		400	0.117	0.118	0.121	0.118667	0.00208167		400	0.099	0.1	0.1	0.0996667	0.00057735

## Sheet: Ferrozine
	FDS							FDM							FDB
	Crude							Crude							Crude
	Conc	1	2	3	Mean	SD		Conc	1	2	3	Mean	SD		Conc	1	2	3	Mean	SD
	0	0.664	0.667	0.677	0.669333	0.00680686		0	0.664	0.667	0.677	0.669333	0.00680686		0	0.664	0.667	0.677	0.669333	0.00680686
	100	0.516	0.551	0.586	0.551	0.035		100	0.428	0.436	0.443	0.435667	0.00750555		100	0.43	0.437	0.443	0.436667	0.00650641
	200	0.434	0.438	0.442	0.438	0.004		200	0.327	0.353	0.357	0.345667	0.0162891		200	0.227	0.286	0.288	0.267	0.0346554
	400	0.264	0.266	0.268	0.266	0.002		400	0.253	0.257	0.261	0.257	0.004		400	0.157	0.161	0.165	0.161	0.004
	Water fraction							Water fraction							Water fraction
	Conc	1	2	3	Mean	SD		Conc	1	2	3	Mean	SD		Conc	1	2	3	Mean	SD
	0	0.664	0.667	0.677	0.669333	0.00680686		0	0.631	0.635	0.639	0.635	0.004		0	0.631	0.635	0.639	0.635	0.004
	100	0.519	0.541	0.545	0.535	0.014		100	0.556	0.557	0.558	0.557	0.001		100	0.434	0.454	0.456	0.448	0.0121655
	200	0.402	0.435	0.455	0.430667	0.0267644		200	0.456	0.469	0.473	0.466	0.00888819		200	0.292	0.293	0.296	0.293667	0.00208167
	400	0.304	0.323	0.342	0.323	0.019		400	0.29	0.297	0.303	0.296667	0.00650641		400	0.188	0.188	0.189	0.188333	0.00057735
	Ethyl acetate fraction							Ethyl acetate fraction							Ethyl acetate fraction
	Conc	1	2	3	Mean	SD		Conc	1	2	3	Mean	SD		Conc	1	2	3	Mean	SD
	0	0.664	0.666	0.667	0.665667	0.00152753		0	0.631	0.635	0.639	0.635	0.004		0	0.67	0.687	0.688	0.681667	0.010116
	100	0.609	0.623	0.638	0.623333	0.0145029		100	0.666	0.676	0.691	0.677667	0.0125831		100	0.651	0.693	0.744	0.696	0.0465725
	200	0.623	0.653	0.655	0.643667	0.0179258		200	0.509	0.631	0.653	0.597667	0.0775715		200	0.64	0.649	0.654	0.647667	0.0070946
	400	0.587	0.593	0.597	0.592333	0.00503322		400	0.555	0.64	0.69	0.628333	0.068252		400	0.636	0.639	0.64	0.638333	0.00208167

## Sheet: CUPRAC
	FDS							FDM							FDB
	Crude							Crude							Crude
	Conc.	1	2	3	Mean	SD		Conc.	1	2	3	Mean	SD		Conc.	1	2	3	Mean	SD
	0	0.069	0.07	0.072	0.0703333	0.00152753		0	0.077	0.081	0.081	0.0796667	0.0023094		0	0.077	0.081	0.081	0.0796667	0.0023094
	0.1	0.105	0.108	0.109	0.107333	0.00208167		0.1	0.277	0.279	0.283	0.279667	0.00305505		0.1	0.211	0.214	0.226	0.217	0.00793725
	0.5	0.231	0.245	0.249	0.241667	0.00945163		0.5	0.776	0.782	0.788	0.782	0.006		0.5	0.635	0.66	0.67	0.655	0.0180278
	1	0.373	0.376	0.379	0.376	0.003		1	1.049	1.077	1.082	1.06933	0.0177858		1	0.917	0.941	0.961	0.939667	0.0220303
	Water fraction							Water fraction							Water fraction
	Conc.	1	2	3	Mean	SD		Conc.	1	2	3	Mean	SD		Conc.	1	2	3	Mean	SD
	0	0.081	0.082	0.082	0.0816667	0.00057735		0	0.069	0.07	0.071	0.07	0.001		0	0.069	0.07	0.071	0.07	0.001
	0.1	0.111	0.112	0.124	0.115667	0.00723418		0.1	0.19	0.191	0.196	0.192333	0.00321455		0.1	0.184	0.194	0.2	0.192667	0.0080829
	0.5	0.244	0.245	0.249	0.246	0.00264575		0.5	0.52	0.523	0.524	0.522333	0.00208167		0.5	0.491	0.53	0.532	0.517667	0.0231157
	1	0.381	0.382	0.39	0.384333	0.00493288		1	0.814	0.815	0.816	0.815	0.001		1	0.818	0.819	0.821	0.819333	0.00152753
	Ethyl acetate fraction							Ethyl acetate fraction							Ethyl acetate fraction
	Conc.	1	2	3	Mean	SD		Conc.	1	2	3	Mean	SD		Conc.	1	2	3	Mean	SD
	0	0.085	0.085	0.085	0.085	0		0	0.085	0.085	0.085	0.085	0		0	0.085	0.085	0.085	0.085	0
	0.1	0.284	0.289	0.296	0.289667	0.00602771		0.1	0.156	0.168	0.168	0.164	0.0069282		0.1	0.165	0.17	0.171	0.168667	0.00321455
	0.5	0.773	0.829	0.834	0.812	0.0338674		0.5	0.422	0.438	0.446	0.435333	0.0122202		0.5	0.433	0.433	0.446	0.437333	0.00750555
	1	1.101	1.151	1.158	1.13667	0.0310859		1	0.645	0.652	0.656	0.651	0.00556776		1	0.645	0.674	0.68	0.666333	0.0187172

## Sheet: Ferricyanide
	FDS							FDM							FDB
	Crude							Crude							Crude
	Conc	1	2	3	Mean	SD		Conc	1	2	3	Mean	SD		Conc	1	2	3	Mean	SD
	0	0.037	0.037	0.039	0.0376667	0.0011547		0	0.037	0.037	0.039	0.0376667	0.0011547		0	0.037	0.037	0.039	0.0376667	0.0011547
	100	0.049	0.048	0.051	0.0493333	0.00152753		100	0.094	0.099	0.102	0.0983333	0.00404145		100	0.072	0.087	0.089	0.0826667	0.00929157
	500	0.177	0.18	0.182	0.179667	0.00251661		500	0.265	0.269	0.285	0.273	0.010583		500	0.254	0.254	0.269	0.259	0.00866025
	1000	0.33	0.33	0.338	0.332667	0.0046188		1000	0.485	0.526	0.548	0.519667	0.0319739		1000	0.445	0.464	0.501	0.47	0.0284781
	Water fraction							Water fraction							Water fraction
	Conc	1	2	3	Mean	SD		Conc	1	2	3	Mean	SD		Conc	1	2	3	Mean	SD
	0	0.037	0.037	0.039	0.0376667	0.0011547		0	0.038	0.039	0.044	0.0403333	0.00321455		0	0.038	0.039	0.044	0.0403333	0.00321455
	100	0.04	0.041	0.042	0.041	0.001		100	0.062	0.062	0.074	0.066	0.0069282		100	0.054	0.055	0.059	0.056	0.00264575
	500	0.153	0.154	0.161	0.156	0.0043589		500	0.239	0.245	0.245	0.243	0.0034641		500	0.206	0.215	0.217	0.212667	0.00585947
	1000	0.267	0.275	0.283	0.275	0.008		1000	0.392	0.431	0.433	0.418667	0.0231157		1000	0.354	0.362	0.395	0.370333	0.0217332
	Ethyl acetate fraction							Ethyl acetate fraction							Ethyl acetate fraction
	Conc	1	2	3	Mean	SD		Conc	1	2	3	Mean	SD		Conc	1	2	3	Mean	SD
	0	0.039	0.041	0.05	0.0433333	0.00585947		0	0.039	0.041	0.05	0.0433333	0.00585947		0	0.039	0.041	0.05	0.0433333	0.00585947
	100	0.057	0.061	0.062	0.06	0.00264575		100	0.065	0.066	0.068	0.0663333	0.00152753		100	0.086	0.089	0.09	0.0883333	0.00208167
	500	0.182	0.187	0.188	0.185667	0.00321455		500	0.193	0.195	0.211	0.199667	0.00986577		500	0.24	0.25	0.253	0.247667	0.00680686
	1000	0.284	0.293	0.296	0.291	0.006245		1000	0.31	0.31	0.354	0.324667	0.0254034		1000	0.394	0.409	0.437	0.413333	0.0218251
