# Supplementary material for: The antioxidant activities, cytotoxic properties, and identification of water-soluble compounds of Ficus deltoidea leaves
Source: PeerJ. 2018 Oct 11;6:e5694. doi: 10.7717/peerj.5694 (PMC6186405; doi:10.7717/peerj.5694)
Supplement: Data S2 [file peerj-06-5694-s002.xlsx]

## Sheet: MRC5
	24 hr
	FDS														FDM														FDB
	Crude														Crude														Crude
	Absorbance							% of inhibition							Absorbance							% of inhibition							Absorbance							% of inhibition
	Conc.	Abs. 1	Abs. 2	Abs. 3	Mean	SD		Conc.	1	2	3	Mean	SD		Conc.	Abs. 1	Abs. 2	Abs. 3	Mean	SD		Conc.	1	2	3	Mean	SD		Conc.	Abs. 1	Abs. 2	Abs. 3	Mean	SD		Conc.	1	2	3	Mean	SD
	0	0.414	0.424	0.425	0.421	0.00608276		0	0	0	0	0	0		0	0.38	0.383	0.409	0.390667	0.0159478		0	0	0	0	0	0		0	0.414	0.415	0.424	0.417667	0.00550757		0	0	0	0	0	0
	50	0.375	0.39	0.401	0.388667	0.0130512		50	9.42029	8.01887	5.64706	7.69541	1.9073		50	0.362	0.375	0.389	0.375333	0.0135031		50	4.73684	2.08877	4.88998	3.9052	1.57493		50	0.378	0.384	0.385	0.382333	0.00378594		50	8.69565	7.46988	9.19811	8.45455	0.888986
	100	0.338	0.35	0.358	0.348667	0.0100664		100	18.3575	17.4528	15.7647	17.1917	1.31597		100	0.333	0.349	0.367	0.349667	0.0170098		100	12.3684	8.87728	10.2689	10.5049	1.75749		100	0.37	0.371	0.373	0.371333	0.00152753		100	10.628	10.6024	12.0283	11.0862	0.815947
	200	0.317	0.323	0.336	0.325333	0.00971253		200	23.43	23.8208	20.9412	22.7306	1.56198		200	0.329	0.332	0.342	0.334333	0.00680686		200	13.4211	13.3159	16.3814	14.3728	1.74031		200	0.333	0.354	0.36	0.349	0.0141774		200	19.5652	14.6988	15.0943	16.4528	2.70269
	500	0.296	0.318	0.325	0.313	0.0151327		500	28.5024	25	23.5294	25.6773	2.55474		500	0.293	0.31	0.317	0.306667	0.0123423		500	22.8947	19.0601	22.4939	21.4829	2.10779		500	0.332	0.341	0.344	0.339	0.006245		500	19.8068	17.8313	18.8679	18.8353	0.988122
	Water fraction														Water fraction														Water fraction
	Absorbance							% of inhibition							Absorbance							% of inhibition							Absorbance							% of inhibition
	Conc.	Abs. 1	Abs. 2	Abs. 3	Mean	SD		Conc.	1	2	3	Mean	SD		Conc.	Abs. 1	Abs. 2	Abs. 3	Mean	SD		Conc.	1	2	3	Mean	SD		Conc.	Abs. 1	Abs. 2	Abs. 3	Mean	SD		Conc.	1	2	3	Mean	SD
	0	0.414	0.424	0.425	0.421	0.00608276		0	0	0	0	0	0		0	0.38	0.383	0.409	0.390667	0.0159478		0	0	0	0	0	0		0	0.414	0.415	0.424	0.417667	0.00550757		0	0	0	0	0	0
	50	0.388	0.389	0.395	0.390667	0.00378594		50	6.28019	8.25472	7.05882	7.19791	0.994583		50	0.348	0.358	0.367	0.357667	0.00950438		50	8.42105	6.52742	10.2689	8.40581	1.87081		50	0.361	0.362	0.363	0.362	0.001		50	12.8019	12.7711	14.3868	13.3199	0.924053
	100	0.362	0.365	0.376	0.367667	0.00737111		100	12.5604	13.9151	11.5294	12.6683	1.1965		100	0.317	0.324	0.329	0.323333	0.00602771		100	16.5789	15.4047	19.5599	17.1812	2.14207		100	0.34	0.352	0.361	0.351	0.0105357		100	17.8744	15.1807	14.8585	15.9712	1.65607
	200	0.33	0.347	0.352	0.343	0.0115326		200	20.2899	18.1604	17.1765	18.5422	1.59143		200	0.285	0.294	0.301	0.293333	0.00802081		200	25	23.2376	26.4059	24.8812	1.58747		200	0.312	0.326	0.329	0.322333	0.00907377		200	24.6377	21.4458	22.4057	22.8297	1.63766
	500	0.325	0.328	0.335	0.329333	0.0051316		500	21.4976	22.6415	21.1765	21.7719	0.770067		500	0.265	0.276	0.285	0.275333	0.0100167		500	30.2632	27.9373	30.3178	29.5061	1.35888		500	0.287	0.29	0.297	0.291333	0.0051316		500	30.6763	30.1205	29.9528	30.2499	0.378709
	Ethyl acetate fraction														Ethyl acetate fraction														Ethyl acetate fraction
	Absorbance							% of inhibition							Absorbance							% of inhibition							Absorbance							% of inhibition
	Conc.	Abs. 1	Abs. 2	Abs. 3	Mean	SD		Conc.	1	2	3	Mean	SD		Conc.	Abs. 1	Abs. 2	Abs. 3	Mean	SD		Conc.	1	2	3	Mean	SD		Conc.	Abs. 1	Abs. 2	Abs. 3	Mean	SD		Conc.	1	2	3	Mean	SD
	0	0.414	0.424	0.425	0.421	0.00608276		0	0	0	0	0	0		0	0.38	0.383	0.409	0.390667	0.0159478		0	0	0	0	0	0		0	0.414	0.415	0.424	0.417667	0.00550757		0	0	0	0	0	0
	50	0.354	0.362	0.37	0.362	0.008		50	14.4928	14.6226	12.9412	14.0189	0.935556		50	0.334	0.342	0.35	0.342	0.008		50	12.1053	10.705	14.4254	12.4119	1.87909		50	0.382	0.39	0.393	0.388333	0.00568624		50	7.72947	6.0241	7.31132	7.02163	0.888828
	100	0.302	0.318	0.329	0.316333	0.0135769		100	27.0531	25	22.5882	24.8805	2.23485		100	0.31	0.327	0.341	0.326	0.0155242		100	18.4211	14.6214	16.6259	16.5561	1.90078		100	0.345	0.354	0.36	0.353	0.00754983		100	16.6667	14.6988	15.0943	15.4866	1.04093
	200	0.28	0.292	0.312	0.294667	0.0161658		200	32.3671	31.1321	26.5882	30.0292	3.04324		200	0.295	0.299	0.31	0.301333	0.00776745		200	22.3684	21.9321	24.2054	22.8353	1.20641		200	0.321	0.33	0.339	0.33	0.009		200	22.4638	20.4819	20.0472	20.9976	1.28819
	500	0.268	0.279	0.289	0.278667	0.010504		500	35.2657	34.1981	32	33.8213	1.66514		500	0.26	0.275	0.278	0.271	0.00964365		500	31.5789	28.1984	32.0293	30.6022	2.0939		500	0.29	0.296	0.31	0.298667	0.0102632		500	29.9517	28.6747	26.8868	28.5044	1.53953
	48 hr
	Crude														Crude														Crude
	Absorbance							% of inhibition							Absorbance							% of inhibition							Absorbance							% of inhibition
	Conc.	Abs. 1	Abs. 2	Abs. 3	Mean	SD		Conc.	1	2	3	Mean	SD		Conc.	Abs. 1	Abs. 2	Abs. 3	Mean	SD		Conc.	1	2	3	Mean	SD		Conc.	Abs. 1	Abs. 2	Abs. 3	Mean	SD		Conc.	1	2	3	Mean	SD
	0	0.477	0.479	0.48	0.478667	0.00152753		0	0	0	0	0	0		0	0.432	0.44	0.453	0.441667	0.0105987		0	0	0	0	0	0		0	0.452	0.469	0.48	0.467	0.0141067		0	0	0	0	0	0
	50	0.352	0.345	0.355	0.350667	0.0051316		50	26.2055	27.9749	26.0417	26.7407	1.07203		50	0.354	0.364	0.371	0.363	0.008544		50	18.0556	17.2727	18.1015	17.8099	0.46581		50	0.369	0.379	0.387	0.378333	0.0090185		50	18.3628	19.1898	19.375	18.9759	0.538921
	100	0.339	0.34	0.348	0.342333	0.00493288		100	28.9308	29.0188	27.5	28.4832	0.852613		100	0.34	0.341	0.343	0.341333	0.00152753		100	21.2963	22.5	24.2826	22.693	1.50245		100	0.327	0.33	0.339	0.332	0.006245		100	27.6549	29.6375	29.375	28.8891	1.07693
	200	0.31	0.338	0.339	0.329	0.0164621		200	35.0105	29.4363	29.375	31.2739	3.23609		200	0.299	0.302	0.308	0.303	0.00458258		200	30.787	31.3636	32.0088	31.3865	0.611217		200	0.273	0.28	0.292	0.281667	0.00960902		200	39.6018	40.2985	39.1667	39.689	0.570938
	500	0.305	0.311	0.314	0.31	0.00458258		500	36.0587	35.0731	34.5833	35.2384	0.751445		500	0.202	0.211	0.213	0.208667	0.00585947		500	53.2407	52.0455	52.9801	52.7554	0.628523		500	0.254	0.263	0.268	0.261667	0.0070946		500	43.8053	43.9232	44.1667	43.9651	0.184275
	Water fraction														Water fraction														Water fraction
	Absorbance							% of inhibition							Absorbance							% of inhibition							Absorbance							% of inhibition
	Conc.	Abs. 1	Abs. 2	Abs. 3	Mean	SD		Conc.	1	2	3	Mean	SD		Conc.	Abs. 1	Abs. 2	Abs. 3	Mean	SD		Conc.	1	2	3	Mean	SD		Conc.	Abs. 1	Abs. 2	Abs. 3	Mean	SD		Conc.	1	2	3	Mean	SD
	0	0.477	0.479	0.48	0.478667	0.00152753		0	0	0	0	0	0		0	0.432	0.44	0.453	0.441667	0.0105987		0	0	0	0	0	0		0	0.452	0.469	0.48	0.467	0.0141067		0	0	0	0	0	0
	50	0.35	0.357	0.36	0.355667	0.0051316		50	26.6247	25.4697	25	25.6982	0.836109		50	0.375	0.382	0.394	0.383667	0.00960902		50	13.1944	13.1818	13.0243	13.1335	0.0948085		50	0.37	0.372	0.373	0.371667	0.00152753		50	18.1416	20.6823	22.2917	20.3719	2.09238
	100	0.319	0.321	0.325	0.321667	0.00305505		100	33.1237	32.9854	32.2917	32.8002	0.445839		100	0.342	0.354	0.355	0.350333	0.00723418		100	20.8333	19.5455	21.6336	20.6708	1.0535		100	0.337	0.346	0.36	0.347667	0.0115902		100	25.4425	26.226	25	25.5562	0.620862
	200	0.3	0.317	0.323	0.313333	0.0119304		200	37.1069	33.8205	32.7083	34.5452	2.28711		200	0.27	0.277	0.285	0.277333	0.00750555		200	37.5	37.0455	37.0861	37.2105	0.251523		200	0.294	0.3	0.32	0.304667	0.0136137		200	34.9558	36.0341	33.3333	34.7744	1.35949
	500	0.274	0.286	0.294	0.284667	0.0100664		500	42.5577	40.2923	38.75	40.5333	1.91524		500	0.216	0.22	0.225	0.220333	0.00450925		500	50	50	50.3311	50.1104	0.191176		500	0.19	0.226	0.231	0.215667	0.0223681		500	57.9646	51.8124	51.875	53.884	3.53405
	Ethyl acetate fraction														Ethyl acetate fraction														Ethyl acetate fraction
	Absorbance							% of inhibition							Absorbance							% of inhibition							Absorbance							% of inhibition
	Conc.	Abs. 1	Abs. 2	Abs. 3	Mean	SD		Conc.	1	2	3	Mean	SD		Conc.	Abs. 1	Abs. 2	Abs. 3	Mean	SD		Conc.	1	2	3	Mean	SD		Conc.	Abs. 1	Abs. 2	Abs. 3	Mean	SD		Conc.	1	2	3	Mean	SD
	0	0.477	0.479	0.48	0.478667	0.00152753		0	0	0	0	0	0		0	0.432	0.44	0.453	0.441667	0.0105987		0	0	0	0	0	0		0	0.452	0.469	0.48	0.467	0.0141067		0	0	0	0	0	0
	50	0.392	0.4	0.424	0.405333	0.0166533		50	17.8197	16.4927	11.6667	15.3264	3.23809		50	0.365	0.374	0.38	0.373	0.00754983		50	15.5093	15	16.1148	15.5413	0.558088		50	0.387	0.396	0.409	0.397333	0.0110604		50	14.3805	15.565	14.7917	14.9124	0.601411
	100	0.347	0.352	0.365	0.354667	0.00929157		100	27.2537	26.5136	23.9583	25.9085	1.72898		100	0.323	0.33	0.356	0.336333	0.0173877		100	25.2315	25	21.4128	23.8814	2.14102		100	0.32	0.328	0.333	0.327	0.00655744		100	29.2035	30.064	30.625	29.9642	0.715966
	200	0.3	0.329	0.339	0.322667	0.0202567		200	37.1069	31.3152	29.375	32.5991	4.02266		200	0.294	0.308	0.31	0.304	0.0087178		200	31.9444	30	31.5673	31.1706	1.03115		200	0.241	0.247	0.255	0.247667	0.00702377		200	46.6814	47.3348	46.875	46.9637	0.335584
	500	0.198	0.211	0.22	0.209667	0.0110604		500	58.4906	55.9499	54.1667	56.2024	2.17298		500	0.23	0.239	0.24	0.236333	0.00550757		500	46.7593	45.6818	47.0199	46.487	0.709363		500	0.172	0.182	0.195	0.183	0.0115326		500	61.9469	61.194	59.375	60.8386	1.32227

## Sheet: Chang
	24 hr
	FDS														FDM														FDB
	Crude														Crude														Crude
	Absorbance							% of inhibition							Absorbance							% of inhibition							Absorbance							% of inhibition
	Conc.	Abs. 1	Abs. 2	Abs. 3	Mean	SD		Conc.	1	2	3	Mean	SD		Conc.	Abs. 1	Abs. 2	Abs. 3	Mean	SD		Conc.	1	2	3	Mean	SD		Conc.	Abs. 1	Abs. 2	Abs. 3	Mean	SD		Conc.	1	2	3	Mean	SD
	0	0.319	0.336	0.343	0.332667	0.0123423		0	0	0	0	0	0		0	0.411	0.426	0.429	0.422	0.00964365		0	0	0	0	0	0		0	0.422	0.427	0.43	0.426333	0.00404145		0	0	0	0	0	0
	50	0.24	0.246	0.259	0.248333	0.00971253		50	24.7649	26.7857	24.4898	25.3468	1.2537		50	0.402	0.409	0.41	0.407	0.0043589		50	2.18978	3.99061	4.4289	3.53643	1.18665		50	0.401	0.411	0.412	0.408	0.00608276		50	4.9763	3.74707	4.18605	4.30314	0.622925
	100	0.228	0.236	0.25	0.238	0.0111355		100	28.5266	29.7619	27.1137	28.4674	1.32509		100	0.382	0.394	0.394	0.39	0.0069282		100	7.05596	7.51174	8.15851	7.5754	0.554024		100	0.372	0.383	0.39	0.381667	0.00907377		100	11.8483	10.3044	9.30233	10.485	1.28258
	200	0.221	0.23	0.237	0.229333	0.00802081		200	30.721	31.5476	30.9038	31.0575	0.434208		200	0.363	0.371	0.389	0.374333	0.0133167		200	11.6788	12.9108	9.32401	11.3045	1.82245		200	0.311	0.327	0.337	0.325	0.0131149		200	26.3033	23.4192	21.6279	23.7835	2.3589
	500	0.205	0.219	0.236	0.22	0.0155242		500	35.7367	34.8214	31.1953	33.9178	2.40174		500	0.34	0.348	0.359	0.349	0.00953939		500	17.2749	18.3099	16.317	17.3006	0.996669		500	0.255	0.261	0.278	0.264667	0.0119304		500	39.5735	38.8759	35.3488	37.9327	2.26473
	Water fraction														Water fraction														Water fraction
	Absorbance							% of inhibition							Absorbance							% of inhibition							Absorbance							% of inhibition
	Conc.	Abs. 1	Abs. 2	Abs. 3	Mean	SD		Conc.	1	2	3	Mean	SD		Conc.	Abs. 1	Abs. 2	Abs. 3	Mean	SD		Conc.	1	2	3	Mean	SD		Conc.	Abs. 1	Abs. 2	Abs. 3	Mean	SD		Conc.	1	2	3	Mean	SD
	0	0.319	0.336	0.343	0.332667	0.0123423		0	0	0	0	0	0		0	0.411	0.426	0.429	0.422	0.00964365		0	0	0	0	0	0		0	0.422	0.427	0.43	0.426333	0.00404145		0	0	0	0	0	0
	50	0.29	0.3	0.306	0.298667	0.0080829		50	9.09091	10.7143	10.7872	10.1975	0.95899		50	0.36	0.367	0.387	0.371333	0.0140119		50	12.4088	13.8498	9.79021	12.0162	2.05804		50	0.372	0.38	0.396	0.382667	0.0122202		50	11.8483	11.007	7.90698	10.2541	2.07575
	100	0.256	0.27	0.279	0.268333	0.0115902		100	19.7492	19.6429	18.6589	19.3503	0.601153		100	0.336	0.348	0.367	0.350333	0.0156312		100	18.2482	18.3099	14.4522	17.0034	2.20962		100	0.343	0.349	0.358	0.35	0.00754983		100	18.7204	18.267	16.7442	17.9105	1.0352
	200	0.251	0.265	0.274	0.263333	0.0115902		200	21.3166	21.131	20.1166	20.8547	0.645928		200	0.342	0.345	0.351	0.346	0.00458258		200	16.7883	19.0141	18.1818	17.9947	1.12461		200	0.333	0.342	0.344	0.339667	0.00585947		200	21.09	19.9063	20	20.3321	0.65805
	500	0.218	0.254	0.261	0.244333	0.0230723		500	31.6614	24.4048	23.9067	26.6576	4.34057		500	0.338	0.341	0.345	0.341333	0.00351188		500	17.7616	19.9531	19.5804	19.0983	1.17259		500	0.298	0.317	0.327	0.314	0.0147309		500	29.3839	25.7611	23.9535	26.3662	2.7653
	Ethyl acetate fraction														Ethyl acetate fraction														Ethyl acetate fraction
	Absorbance							% of inhibition							Absorbance							% of inhibition							Absorbance							% of inhibition
	Conc.	Abs. 1	Abs. 2	Abs. 3	Mean	SD		Conc.	1	2	3	Mean	SD		Conc.	Abs. 1	Abs. 2	Abs. 3	Mean	SD		Conc.	1	2	3	Mean	SD		Conc.	Abs. 1	Abs. 2	Abs. 3	Mean	SD		Conc.	1	2	3	Mean	SD
	0	0.319	0.336	0.343	0.332667	0.0123423		0	0	0	0	0	0		0	0.411	0.426	0.429	0.422	0.00964365		0	0	0	0	0	0		0	0.422	0.427	0.43	0.426333	0.00404145		0	0	0	0	0	0
	50	0.3	0.318	0.329	0.315667	0.0146401		50	5.95611	5.35714	4.08163	5.13163	0.957372		50	0.371	0.382	0.389	0.380667	0.00907377		50	9.73236	10.3286	9.32401	9.795	0.505236		50	0.355	0.369	0.376	0.366667	0.0106927		50	15.8768	13.5831	12.5581	14.006	1.69925
	100	0.263	0.282	0.29	0.278333	0.0138684		100	17.5549	16.0714	15.4519	16.3594	1.08065		100	0.323	0.331	0.335	0.329667	0.0061101		100	21.4112	22.3005	21.9114	21.8744	0.445796		100	0.316	0.322	0.33	0.322667	0.00702377		100	25.1185	24.5902	23.2558	24.3215	0.959961
	200	0.236	0.25	0.27	0.252	0.017088		200	26.0188	25.5952	21.2828	24.2989	2.62063		200	0.253	0.276	0.28	0.269667	0.0145717		200	38.4428	35.2113	34.7319	36.1287	2.01839		200	0.253	0.259	0.268	0.26	0.00754983		200	40.0474	39.3443	37.6744	39.022	1.21886
	500	0.198	0.209	0.317	0.241333	0.0657597		500	37.931	37.7976	7.58017	27.7696	17.4847		500	0.23	0.245	0.25	0.241667	0.0104083		500	44.0389	42.4883	41.7249	42.7507	1.17911		500	0.214	0.229	0.232	0.225	0.00964365		500	49.2891	46.37	46.0465	47.2352	1.78606
	48 hr
	Crude														Crude														Crude
	Absorbance							% of inhibition							Absorbance							% of inhibition							Absorbance							% of inhibition
	Conc.	Abs. 1	Abs. 2	Abs. 3	Mean	SD		Conc.	1	2	3	Mean	SD		Conc.	Abs. 1	Abs. 2	Abs. 3	Mean	SD		Conc.	1	2	3	Mean	SD		Conc.	Abs. 1	Abs. 2	Abs. 3	Mean	SD		Conc.	1	2	3	Mean	SD
	0	0.388	0.392	0.4	0.393333	0.0061101		0	0	0	0	0	0		0	0.437	0.442	0.446	0.441667	0.00450925		0	0	0	0	0	0		0	0.449	0.458	0.471	0.459333	0.0110604		0	0	0	0	0	0
	50	0.291	0.312	0.32	0.307667	0.0149778		50	25	20.4082	20	21.8027	2.77644		50	0.327	0.335	0.336	0.332667	0.00493288		50	25.1716	24.2081	24.6637	24.6811	0.481978		50	0.375	0.391	0.401	0.389	0.0131149		50	16.4811	14.6288	14.862	15.324	1.00884
	100	0.256	0.265	0.275	0.265333	0.00950438		100	34.0206	32.398	31.25	32.5562	1.39207		100	0.3	0.309	0.311	0.306667	0.00585947		100	31.3501	30.0905	30.2691	30.5699	0.681567		100	0.327	0.336	0.345	0.336	0.009		100	27.1715	26.6376	26.7516	26.8535	0.281191
	200	0.209	0.216	0.228	0.217667	0.00960902		200	46.134	44.898	43	44.6773	1.57862		200	0.302	0.306	0.313	0.307	0.00556776		200	30.8924	30.7692	29.8206	30.4941	0.586491		200	0.298	0.302	0.319	0.306333	0.0111505		200	33.6303	34.0611	32.2718	33.3211	0.933906
	500	0.168	0.174	0.194	0.178667	0.0136137		500	56.701	55.6122	51.5	54.6044	2.74307		500	0.273	0.276	0.279	0.276	0.003		500	37.5286	37.5566	37.4439	37.5097	0.0586383		500	0.182	0.194	0.211	0.195667	0.0145717		500	59.4655	57.6419	55.2017	57.4364	2.13931
	Water fraction														Water fraction														Water fraction
	Absorbance							% of inhibition							Absorbance							% of inhibition							Absorbance							% of inhibition
	Conc.	Abs. 1	Abs. 2	Abs. 3	Mean	SD		Conc.	1	2	3	Mean	SD		Conc.	Abs. 1	Abs. 2	Abs. 3	Mean	SD		Conc.	1	2	3	Mean	SD		Conc.	Abs. 1	Abs. 2	Abs. 3	Mean	SD		Conc.	1	2	3	Mean	SD
	0	0.388	0.392	0.4	0.393333	0.0061101		0	0	0	0	0	0		0	0.437	0.442	0.446	0.441667	0.00450925		0	0	0	0	0	0		0	0.449	0.458	0.471	0.459333	0.0110604		0	0	0	0	0	0
	50	0.342	0.349	0.36	0.350333	0.00907377		50	11.8557	10.9694	10	10.9417	0.928145		50	0.341	0.343	0.358	0.347333	0.00929157		50	21.968	22.3982	19.7309	21.3657	1.43199		50	0.395	0.396	0.408	0.399667	0.00723418		50	12.0267	13.5371	13.3758	12.9799	0.829387
	100	0.294	0.318	0.32	0.310667	0.0144684		100	24.2268	18.8776	20	21.0348	2.82076		100	0.317	0.324	0.325	0.322	0.0043589		100	27.46	26.6968	27.13	27.0956	0.382724		100	0.314	0.321	0.329	0.321333	0.00750555		100	30.0668	29.9127	30.1486	30.0427	0.119812
	200	0.224	0.235	0.24	0.233	0.00818535		200	42.268	40.051	40	40.773	1.29498		200	0.31	0.318	0.319	0.315667	0.00493288		200	29.0618	28.0543	28.4753	28.5305	0.506001		200	0.276	0.279	0.298	0.284333	0.0119304		200	38.5301	39.083	36.7304	38.1145	1.23014
	500	0.18	0.189	0.209	0.192667	0.0148436		500	53.6082	51.7857	47.75	51.048	2.99799		500	0.282	0.286	0.287	0.285	0.00264575		500	35.4691	35.2941	35.6502	35.4711	0.178062		500	0.21	0.227	0.241	0.226	0.0155242		500	53.2294	50.4367	48.8323	50.8328	2.22516
	Ethyl acetate fraction														Ethyl acetate fraction														Ethyl acetate fraction
	Absorbance							% of inhibition							Absorbance							% of inhibition							Absorbance							% of inhibition
	Conc.	Abs. 1	Abs. 2	Abs. 3	Mean	SD		Conc.	1	2	3	Mean	SD		Conc.	Abs. 1	Abs. 2	Abs. 3	Mean	SD		Conc.	1	2	3	Mean	SD		Conc.	Abs. 1	Abs. 2	Abs. 3	Mean	SD		Conc.	1	2	3	Mean	SD
	0	0.388	0.392	0.4	0.393333	0.0061101		0	0	0	0	0	0		0	0.437	0.442	0.446	0.441667	0.00450925		0	0	0	0	0	0		0	0.449	0.458	0.471	0.459333	0.0110604		0	0	0	0	0	0
	50	0.32	0.342	0.357	0.339667	0.01861		50	17.5258	12.7551	10.75	13.677	3.48068		50	0.376	0.392	0.409	0.392333	0.0165025		50	13.9588	11.3122	8.29596	11.189	2.83343		50	0.365	0.369	0.376	0.37	0.00556776		50	18.7082	19.4323	20.1699	19.4368	0.730816
	100	0.263	0.27	0.283	0.272	0.0101489		100	32.2165	31.1224	29.25	30.863	1.50017		100	0.311	0.324	0.335	0.323333	0.0120139		100	28.833	26.6968	24.8879	26.8059	1.97479		100	0.316	0.328	0.349	0.331	0.0167033		100	29.6214	28.3843	25.9023	27.9693	1.89393
	200	0.216	0.228	0.238	0.227333	0.0110151		200	44.3299	41.8367	40.5	42.2222	1.94383		200	0.237	0.259	0.274	0.256667	0.01861		200	45.7666	41.4027	38.565	41.9114	3.62764		200	0.224	0.236	0.257	0.239	0.0167033		200	50.1114	48.4716	45.4352	48.0061	2.37256
	500	0.179	0.184	0.199	0.187333	0.0104083		500	53.866	53.0612	50.25	52.3924	1.8985		500	0.2	0.224	0.25	0.224667	0.0250067		500	54.2334	49.3213	43.9462	49.167	5.14535		500	0.176	0.184	0.193	0.184333	0.0085049		500	60.8018	59.8253	59.0234	59.8835	0.890639
